# Supplementary material
Source: MDPI journal article supplement (https://www.mdpi.com/2073-4441/8/11/501)
Supplement: s1 [file s1]

# Supplementary Materials: The Tradeoffs between Market Returns from Agricultural Crops and Non-Market Ecosystem Service Benefits on an Irrigated Agricultural Landscape in the Presence of Groundwater Overdraft

Kent F. Kovacs, Ying Xu, Grant H. West and Michael Popp

Table S1 indicates the initial 2013 crop mix and aquifer conditions for the study area. Table S2 indicates the economic and irrigation model parameters. Variable irrigation costs from wells or reservoirs include fuel, lube and oil, irrigation labor, and poly pipe for furrow irrigation plus the levee gates for the flood irrigation of rice [1]. The next two tables indicate the water purification model parameters for nutrient and sediment pollution, respectively. Table S3 shows the values for nutrient loading, evapotranspiration, rooting depth, available water capacity, and vegetation filtering. Table S4 reports the values for crop/vegetation and management factor, support practice factor, and sediment filtering. Table S5 summarizes the carbon model parameters used while Figure S1 provides a visual summary of GHG emission and sequestration differences across crops and CRP.

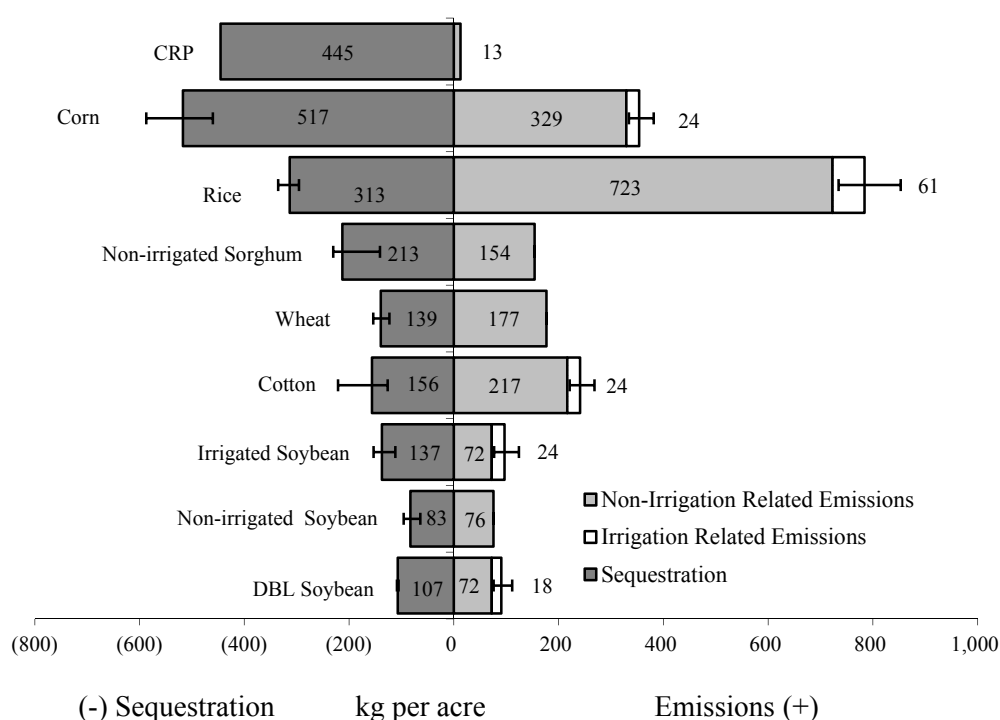

**Figure S1.** Summary of Soil Carbon Sequestration and GHG Emissions by Crop. Note: The Error bars provide the range of sequestration and irrigation fuel use emissions associated with yield and irrigation depth and irrigation type (well vs. reservoir) changes across the study region. Additional variation is modeled with changes in soil texture but not included in this diagram. Conservation reserve program carbon equivalent footprint is taken from [2] where regional variation due to yield is not taken into consideration.

**Table S1.** Descriptive statistics of the spatially variable data across the sites of the study area.

| Variable                                                                                                                                                                     | Definition                                                                                                                                                                                                            | Mean                                    | Std. Dev.                     | Sum<br>(Thousands)                    |
|------------------------------------------------------------------------------------------------------------------------------------------------------------------------------|-----------------------------------------------------------------------------------------------------------------------------------------------------------------------------------------------------------------------|-----------------------------------------|-------------------------------|---------------------------------------|
| $L_{i, \text{rice}}, L_{i, \text{corn}}, L_{i, \text{cotto}},$<br>$L_{i, \text{isoy}}, L_{i, \text{dsor}}, L_{i, \text{dsor}},$<br>$L_{i, \text{dbl}}$                       | Initial acres of rice, corn, cotton, irrigated soybean, dry land soybean, dry land sorghum, double crop irrigated soybean and winter wheat                                                                            | 81; 52; 10;<br>165; 57; 7; 47           | 99; 77; 40;<br>97; 49; 23; 73 | 221; 143;<br>26; 449;<br>155; 20; 129 |
| $y_{i, \text{rice}}, y_{i, \text{cotton}}, y_{i, \text{corn}},$<br>$y_{i, \text{isoy}}, y_{i, \text{dsor}}, y_{i, \text{dsor}},$<br>$y_{i, \text{dbl}}, y_{i, \text{wheat}}$ | Annual rice yield (cwt per acre), cotton yield (pounds per acre), corn, irrigated soybean, dry land soybean, dry land sorghum, double crop irrigated soybean, and winter wheat yields (bushels per acre) <sup>1</sup> | 71; 1054;<br>166; 42; 25;<br>66; 34; 57 | 3; 168; 11; 4;<br>3; 12; 1; 5 | -                                     |
| $dp_i$                                                                                                                                                                       | Depth to water (feet)                                                                                                                                                                                                 | 57                                      | 31                            | -                                     |
| $AQ_i$                                                                                                                                                                       | Initial aquifer size (acre-feet)                                                                                                                                                                                      | 27,587                                  | 12,514                        | 82,016                                |
| $K$                                                                                                                                                                          | Hydraulic conductivity (feet per day)                                                                                                                                                                                 | 226                                     | 92                            | -                                     |
| $nr_i$                                                                                                                                                                       | Annual natural recharge of the aquifer per acre (acre-feet)                                                                                                                                                           | 0.001                                   | 0.04                          | 547                                   |

Note: Number of sites is 2724. <sup>1</sup> The mean and the standard deviation of the county yields come from the 11 counties in the study area.

**Table S2.** Value of economic and irrigation model parameters.

| Parameter                                                                                                                                                                   | Definition                                                                                                                                                                                                                        | Value                                            |
|-----------------------------------------------------------------------------------------------------------------------------------------------------------------------------|-----------------------------------------------------------------------------------------------------------------------------------------------------------------------------------------------------------------------------------|--------------------------------------------------|
| $pr_{\text{rice}}, pr_{\text{cot}}, pr_{\text{corn}}, pr_{\text{soy}},$<br>$pr_{\text{sorg}}, pr_{\text{wht}}, pr_{\text{crp}}$                                             | Price of rice (\$/cwt), cotton (\$/lbs), corn, soybeans, sorghum, and wheat (\$/bushel), and the government payment per acre for CRP                                                                                              | 14.00, 0.88,<br>5.50, 11.99,<br>5.23, 6.39, 69.5 |
| $ca_{\text{rice}}, ca_{\text{corn}}, ca_{\text{cotton}},$<br>$ca_{\text{isoy}}, ca_{\text{dsor}}, ca_{\text{dsor}},$<br>$ca_{\text{dbl}}, ca_{\text{wht}}, ca_{\text{crp}}$ | Annual production cost excluding irrigation fuel for rice, corn, cotton, irrigated soybean, non-irrigated soybean, non-irrigated sorghum, double crop irrigated soybean, winter wheat, and conservation reserve program (\$/acre) | 646, 605, 715,<br>326, 289, 270,<br>326, 307, 26 |
| $wd_{\text{rice}}, wd_{\text{corn}}, wd_{\text{cotton}},$<br>$wd_{\text{isoy}}, wd_{\text{dbl}}$                                                                            | Annual irrigation per acre of rice, corn, cotton, full-season soybean, and double crop soybean (acre-feet)                                                                                                                        | 2.5, 1.0, 1.0,<br>1.0, 0.75                      |
| $\omega_{\min}, \omega_{\max}$                                                                                                                                              | Annual minimum and maximum capacity of a one acre reservoir (acre-feet)                                                                                                                                                           | 1.4, 11                                          |
| $c^r$                                                                                                                                                                       | Estimated annual per acre cost of reservoir (\$/acre)                                                                                                                                                                             | 376.8 <sup>a</sup>                               |
| $c^{rw}$                                                                                                                                                                    | Cost to re-lift an acre-foot to and from the reservoir (\$/acre-foot)                                                                                                                                                             | 22.62                                            |
| $c^p$                                                                                                                                                                       | Cost to raise an acre-foot of water by one foot (\$/foot)                                                                                                                                                                         | 0.55                                             |
| $\delta_t$                                                                                                                                                                  | Discount factor                                                                                                                                                                                                                   | 0.95                                             |
| $\xi_{\text{r}}$                                                                                                                                                            | Soil factor, fraction of carbon lost to respiration due to soil related microbial activity                                                                                                                                        | 0.72                                             |

Notes: <sup>a</sup> This is the amortized cost to construct an additional acre of reservoir. The first acre of the reservoir constructed is more expensive, and the last acre of reservoir constructed is less expensive.

**Table S3.** Values for nutrient loading, evapotranspiration, rooting depth, available water capacity, and vegetation filtering.

| LULC                                                                                                                                                                   | Evapotranspiration | Rooting Depth | Phosphorus Loading | Phosphorus Filtering | Nitrogen Loading | Nitrogen Filtering |
|------------------------------------------------------------------------------------------------------------------------------------------------------------------------|--------------------|---------------|--------------------|----------------------|------------------|--------------------|
| Corn                                                                                                                                                                   | 1200(e)            | 900(c)        | 2210(a)            | 25(b)                | 12,420(a)        | 50(d)              |
| Cotton                                                                                                                                                                 | 1200(e)            | 1000(j)       | 4310(a)            | 25(b)                | 9310(a)          | 25(b)              |
| Rice                                                                                                                                                                   | 1200(e)            | 550(i)        | 450(f)             | 80(h)                | 600(f)           | 90(l)              |
| Soybeans, Dbl Crop Winter Wht/Soybean                                                                                                                                  | 1150(e)            | 740(c)        | 1907(k)            | 62(k)                | 4712(k)          | 70(k)              |
| Sorghum, Sunflower, Winter Wheat, Oats, Millet, Safflower,<br>Other Crops, Peas, Peaches, Pecans, Squash, Dbl Crop Winter<br>Wht/Corn, Dbl Crop Soybeans/Oats, Cabbage | 600(b)             | 700(b)        | 2320(a)            | 62(k)                | 5630(a)          | 70(k)              |
| Fallow/Idle Cropland                                                                                                                                                   | 200(b)             | 500(b)        | 100(b)             | 50(b)                | 3400(b)          | 50(b)              |
| Pasture/Hay                                                                                                                                                            | 850(b)             | 1000(b)       | 100(b)             | 25(b)                | 3100(b)          | 25(b)              |
| Open Water                                                                                                                                                             | 1000(b)            | 1000(b)       | 1(b)               | 5(b)                 | 1(b)             | 5(b)               |
| Developed/Open Space, Developed/Low Density,<br>Developed/Medium Density, Developed/High Density                                                                       | 100(b)             | 10(b)         | 500(b)             | 5(b)                 | 4000(b)          | 5(b)               |
| Barren                                                                                                                                                                 | 200(b)             | 10(b)         | 1(b)               | 5(b)                 | 4000(b)          | 5(b)               |
| Deciduous Forest, Evergreen Forest, Mixed Forest, Shrubland                                                                                                            | 1000(b)            | 7000(b)       | 35(a)              | 70(g)                | 2862(a)          | 80(b)              |
| Grassland Herbaceous                                                                                                                                                   | 650(b)             | 2000(b)       | 50(b)              | 60(g)                | 4000(b)          | 40(b)              |
| Woody Wetlands, Wetlands                                                                                                                                               | 1000(b)            | 7000(b)       | 50(b)              | 80(b)                | 2000(b)          | 80(b)              |

Notes: Source: (a) [2]; (b) [3]; (c) [4]; (d) [5]; (e) [6]; (f) [7]; (g) [8]; (h) [9]; (i) [10]; (j) [11]; (k) [12]; (l) [13].

**Table S4.** Values for crop/vegetation and management factor, support practice factor, and sediment filtering.

| LULC                                                                                                                                                             | Crop/Vegetation and Management Factor | Support Practice Factor | Sediment Filtering |
|------------------------------------------------------------------------------------------------------------------------------------------------------------------|---------------------------------------|-------------------------|--------------------|
| Corn                                                                                                                                                             | 130(c)                                | 400(c)                  | 25(a)              |
| Cotton                                                                                                                                                           | 170(c)                                | 400(c)                  | 25(a)              |
| Rice                                                                                                                                                             | 90(c)                                 | 400(c)                  | 25(a)              |
| Soybeans, Dbl Crop Winter Wht/Soybean                                                                                                                            | 120(c)                                | 400(c)                  | 25(a)              |
| Sorghum, Sunflower, Winter Wheat, Oats, Millet, Safflower, Other Crops, Peas, Peaches, Pecans, Squash, Dbl Crop Winter Wht/Corn, Dbl Crop Soybeans/Oats, Cabbage | 170(c)                                | 400(c)                  | 25(a)              |
| Fallow/Idle Cropland                                                                                                                                             | 8(c)                                  | 200(c)                  | 5(a)               |
| Pasture/Hay                                                                                                                                                      | 20(a)                                 | 250(a)                  | 40(a)              |
| Open Water                                                                                                                                                       | 1(a)                                  | 1(a)                    | 80(a)              |
| Developed/Open Space, Developed/Low Density, Developed/Medium Density, Developed/High Density                                                                    | 1(a)                                  | 1(a)                    | 5(a)               |
| Barren                                                                                                                                                           | 250(a)                                | 10(a)                   | 20(a)              |
| Deciduous Forest, Evergreen Forest, Mixed Forest, Shrubland                                                                                                      | 3(b)                                  | 200(b)                  | 60(a)              |
| Grassland Herbaceous                                                                                                                                             | 8(c)                                  | 200(c)                  | 40(a)              |
| Woody Wetlands, Herbaceous Wetlands                                                                                                                              | 10(a)                                 | 200(a)                  | 60(a)              |

Notes: Source: (a) [14]; (b) [15]; (c) [16].

**Table S5.** Value for carbon model parameters.

| Parameter                                                                                                                         | Definition                                                                                                                                                                                                                                                                                               | Value                                          |
|-----------------------------------------------------------------------------------------------------------------------------------|----------------------------------------------------------------------------------------------------------------------------------------------------------------------------------------------------------------------------------------------------------------------------------------------------------|------------------------------------------------|
| $\lambda_{rice}, \lambda_{corn}, \lambda_{cotton}, \lambda_{isoy}, \lambda_{dsoy}, \lambda_{dsorg}, \lambda_{dbl}, \lambda_{wht}$ | Yield multiplier to convert from conventional yield units to kg per acre for rice (hundred weight), corn (bushels), cotton (pounds of lint), irrigated soybean (bushels), non-irrigated soybean (bushels), non-irrigated sorghum (bushels), double crop irrigated soybean (bushels), and wheat (bushels) | 45.5, 25.4, 1.19, 27.2, 27.2, 25, 27.2         |
| $\alpha_{rice}, \alpha_{corn}, \alpha_{cotton}, \alpha_{isoy}, \alpha_{dsoy}, \alpha_{dsorg}, \alpha_{dbl}, \alpha_{wht}$         | Moisture content (wet basis) of rice, corn, cotton, irrigated soybean, non-irrigated soybean, non-irrigated sorghum, and double crop irrigated soybean and winter wheat                                                                                                                                  | 0.13, 0.155, 0, 0.13, 0.13, 0.14, 0.13, 0.135  |
| $H_{rice}, H_{corn}, H_{cotton}, H_{isoy}, H_{dsoy}, H_{dsorg}, H_{dbl}, H_{wht}$                                                 | Harvest index (grain weight to total above ground biomass weight) of rice, corn, cotton, irrigated soybean, non-irrigated soybean, non-irrigated sorghum, and double crop irrigated soybean and winter wheat                                                                                             | 0.45, 0.43, 0.45, 0.45, 0.45, 0.39, 0.45, 0.46 |
| $\beta_{rice}, \beta_{corn}, \beta_{cotton}, \beta_{isoy}, \beta_{dsoy}, \beta_{dsorg}, \beta_{dbl}, \beta_{wheat}$               | Crop residue C content of rice, corn, cotton, irrigated soybean, non-irrigated soybean, non-irrigated sorghum, and double crop irrigated soybean and winter wheat in g per kg.                                                                                                                           | 360, 410, 420, 430, 430, 420, 430, 340         |
| $\delta_{low}, \delta_{conventional}$                                                                                             | Fraction of aboveground biomass C remaining in the soil with low tillage, and conventional tillage                                                                                                                                                                                                       | 0.40, 0.70                                     |
| $\eta_{low}, \eta_{conventional}$                                                                                                 | Fraction of belowground biomass C remaining in the soil with low tillage, and conventional tillage                                                                                                                                                                                                       | 0.45, 0.40                                     |
| $\chi_{rice}, \chi_{corn}, \chi_{cotton}, \chi_{isoy}, \chi_{dsoy}, \chi_{dsorg}, \chi_{dbl}, \chi_{wheat}$                       | Root C content of rice, corn, cotton, irrigated soybean, non-irrigated soybean, non-irrigated sorghum, and double crop irrigated soybean and winter wheat in g per kg.                                                                                                                                   | 350, 420, 360, 430, 430, 380, 430, 280         |
| $\phi_{rice}, \phi_{corn}, \phi_{cotton}, \phi_{isoy}, \phi_{dsoy}, \phi_{dsorg}, \phi_{dbl}, \phi_{wheat}$                       | Root/shoot ratio (below ground biomass weight/above ground biomass weight) of rice, corn, cotton, irrigated soybean, non-irrigated soybean, non-irrigated sorghum, and double crop irrigated soybean and winter wheat                                                                                    | 0.16, 0.19, 0.21, 0.16, 0.16, 0.08, 0.16, 0.18 |
| $\sigma_g, \sigma_r$                                                                                                              | Conversion factors to track the carbon emitted from fuel combustion to lift an acre-foot of water one foot and the carbon emitted from fuel combustion to pump an acre-foot of water into a reservoir and back out to the field.                                                                         | 10.37, 190.95                                  |

Note: Source: [17].

Tables S6–S9 indicates the land covers, the irrigation water use, and the ecosystem services in the final period of the model for points along the efficiency frontiers that optimize all ecosystem service value, groundwater buffer value, water purification value, and greenhouse gas reduction value, respectively. Tables S10 indicates the same features of the landscape in the final period when conservation policies influence the economic returns objective for the landscape with reservoirs.

**Table S6.** Land, water use, and ecosystem service in the final period for a selected point on the efficiency frontiers optimizing all ecosystem service values.

| Land and Water Use and Ecosystem Services   | Without Reservoirs |        |        | With Reservoirs |        |        |
|---------------------------------------------|--------------------|--------|--------|-----------------|--------|--------|
|                                             | A                  | C      | E      | F               | H      | J      |
| Rice                                        | 0                  | 0      | 164    | 0               | 0      | 204    |
| Irrigated corn                              | 0                  | 266    | 379    | 0               | 383    | 412    |
| Irrigated cotton                            | 0                  | 16     | 96     | 0               | 5      | 99     |
| Irrigated soybeans                          | 0                  | 49     | 183    | 0               | 16     | 192    |
| Non-irrigated soybeans                      | 0                  | 0      | 0      | 0               | 0      | 0      |
| Non-irrigated sorghum                       | 0                  | 160    | 206    | 0               | 109    | 178    |
| Double crop soybean                         | 0                  | 0      | 15     | 0               | 0      | 26     |
| Reservoirs                                  | 0                  | 0      | 0      | 0               | 17     | 17     |
| CRP                                         | 1,141              | 650    | 98     | 1,141           | 611    | 13     |
| Groundwater use<br>(thousand acre-feet)     | 0                  | 331    | 1080   | 0               | 204    | 1031   |
| Reservoir water use<br>(thousand acre-feet) | 0                  | 0      | 0      | 0               | 201    | 204    |
| Aquifer<br>(thousand acre-feet)             | 91,711             | 83,135 | 59,141 | 91,711          | 86,674 | 61,931 |
| Net carbon emissions (thousand tons)        | −493               | −227   | 823    | −493            | −262   | 830    |
| Methane emissions (thousand tons)           | 0                  | 0      | 80     | 0               | 0      | 100    |
| Annual phosphorus<br>exports (tons)         | 4                  | 63     | 123    | 4               | 62     | 125    |
| Annual nitrogen exports (tons)              | 124                | 259    | 359    | 124             | 276    | 361    |
| Annual sediment<br>exports (thousand tons)  | 101                | 471    | 948    | 101             | 446    | 985    |

Notes: Land use is reported in thousands of acres. Net carbon emissions are positive when emissions exceeds sequestration and negative when sequestration exceed emissions.

**Table S7.** Land, water use, and ecosystem service in the final period for a selected point on the efficiency frontiers optimizing only groundwater buffer value.

| Land and Water Use and Ecosystem Services   | Without Reservoirs |        |        | With Reservoirs |        |        |
|---------------------------------------------|--------------------|--------|--------|-----------------|--------|--------|
|                                             | L                  | M      | N      | Q               | R      | S      |
| Rice                                        | 0                  | 49     | 25     | 171             | 176    | 181    |
| Irrigated corn                              | 91                 | 326    | 378    | 411             | 412    | 412    |
| Irrigated cotton                            | 2                  | 37     | 93     | 98              | 99     | 99     |
| Irrigated soybeans                          | 0                  | 0      | 83     | 92              | 102    | 172    |
| Non-irrigated soybeans                      | 2                  | 2      | 0      | 0               | 0      | 0      |
| Non-irrigated sorghum                       | 322                | 321    | 316    | 250             | 251    | 186    |
| Double crop soybean                         | 0                  | 0      | 4      | 25              | 28     | 30     |
| Reservoirs                                  | 0                  | 0      | 0      | 78              | 58     | 43     |
| CRP                                         | 725                | 456    | 242    | 16              | 16     | 18     |
| Groundwater use<br>(thousand acre-feet)     | 93                 | 363    | 620    | 154             | 408    | 666    |
| Reservoir water use<br>(thousand acre-feet) | 0                  | 0      | 0      | 892             | 664    | 491    |
| Aquifer<br>(thousand acre-feet)             | 89,169             | 81,454 | 73,793 | 88,964          | 81,305 | 73,634 |
| Net carbon emissions (thousand tons)        | −275               | −89    | 176    | 230             | 306    | 458    |
| Methane emissions (thousand tons)           | 0                  | 0      | 12     | 83              | 86     | 88     |
| Annual phosphorus<br>exports (tons)         | 47                 | 91     | 119    | 115             | 121    | 122    |
| Annual nitrogen exports (tons)              | 197                | 316    | 367    | 335             | 349    | 354    |
| Annual sediment<br>exports (thousand tons)  | 427                | 662    | 857    | 873             | 916    | 945    |

Notes: Land use is reported in thousands of acres. Net carbon emissions are positive when emissions exceeds sequestration and negative when sequestration exceed emissions.

**Table S8.** Land, water use, and ecosystem service in the final period for a selected point on the efficiency frontiers optimizing only water purification value.

| Land and Water Use and Ecosystem Services   | Without Reservoirs |        |        | With Reservoirs |        |        |
|---------------------------------------------|--------------------|--------|--------|-----------------|--------|--------|
|                                             | V                  | W      | X      | AA              | BB     | CC     |
| Rice                                        | 110                | 116    | 129    | 138             | 151    | 170    |
| Irrigated corn                              | 199                | 231    | 269    | 214             | 245    | 289    |
| Irrigated cotton                            | 25                 | 29     | 38     | 24              | 28     | 37     |
| Irrigated soybeans                          | 89                 | 104    | 130    | 91              | 109    | 132    |
| Non-irrigated soybeans                      | 0                  | 0      | 0      | 0               | 0      | 0      |
| Non-irrigated sorghum                       | 64                 | 63     | 81     | 48              | 57     | 71     |
| Double crop soybean                         | 8                  | 8      | 9      | 15              | 16     | 18     |
| Reservoirs                                  | 0                  | 0      | 0      | 13              | 14     | 16     |
| CRP                                         | 647                | 592    | 486    | 597             | 520    | 407    |
| Groundwater use<br>(thousand acre-feet)     | 592                | 658    | 765    | 536             | 605    | 705    |
| Reservoir water use<br>(thousand acre-feet) | 0                  | 0      | 0      | 151             | 167    | 191    |
| Aquifer<br>(thousand acre-feet)             | 65,580             | 64,120 | 62,487 | 68,776          | 67,410 | 65,858 |
| Net carbon emissions (thousand tons)        | 182                | 250    | 374    | 176             | 261    | 388    |
| Methane emissions (thousand tons)           | 53                 | 56     | 62     | 67              | 74     | 83     |
| Annual phosphorus<br>exports (tons)         | 28                 | 35     | 48     | 28              | 36     | 49     |
| Annual nitrogen exports (tons)              | 173                | 190    | 217    | 170             | 185    | 212    |
| Annual sediment<br>exports (thousand tons)  | 270                | 306    | 396    | 277             | 321    | 408    |

Notes: Land use is reported in thousands of acres. Net carbon emissions are positive when emissions exceeds sequestration and negative when sequestration exceed emissions.

**Table S9.** Land, water use, and ecosystem service in the final period for a selected point on the efficiency frontiers optimizing only greenhouse gases value.

| Land and Water Use and Ecosystem Services   | Without Reservoirs |        |        | With Reservoirs |        |        |
|---------------------------------------------|--------------------|--------|--------|-----------------|--------|--------|
|                                             | FF                 | GG     | HH     | KK              | LL     | MM     |
| Rice                                        | 0                  | 0      | 10     | 0               | 0      | 0      |
| Irrigated corn                              | 199                | 0      | 0      | 244             | 355    | 412    |
| Irrigated cotton                            | 2                  | 22     | 93     | 2               | 3      | 39     |
| Irrigated soybeans                          | 1                  | 184    | 216    | 0               | 3      | 69     |
| Non-irrigated soybeans                      | 0                  | 0      | 0      | 0               | 0      | 0      |
| Non-irrigated sorghum                       | 19                 | 171    | 284    | 0               | 24     | 185    |
| Double crop soybean                         | 0                  | 4      | 28     | 0               | 0      | 0      |
| Reservoirs                                  | 0                  | 0      | 0      | 8               | 15     | 17     |
| CRP                                         | 920                | 759    | 511    | 888             | 741    | 417    |
| Groundwater use<br>(thousand acre-feet)     | 203                | 211    | 354    | 147             | 187    | 313    |
| Reservoir water use<br>(thousand acre-feet) | 0                  | 0      | 0      | 99              | 174    | 208    |
| Aquifer<br>(thousand acre-feet)             | 86,748             | 86,610 | 82,597 | 88,694          | 87,040 | 83,474 |
| Net carbon emissions (thousand tons)        | −388               | −300   | −120   | −390            | −318   | −139   |
| Methane emissions (thousand tons)           | 0                  | 3      | 47     | 0               | 0      | 0      |
| Annual phosphorus<br>exports (tons)         | 35                 | 49     | 81     | 35              | 54     | 94     |
| Annual nitrogen exports (tons)              | 211                | 184    | 233    | 216             | 265    | 332    |
| Annual sediment<br>exports (thousand tons)  | 280                | 425    | 650    | 286             | 403    | 667    |

Notes: Land use is reported in thousands of acres. Net carbon emissions are positive when emissions exceeds sequestration and negative when sequestration exceed emissions.



**Table S10.** Land, water use, and ecosystem service in the final period that result when conservation policies influence the economic returns objective for the landscape with reservoirs.

| Land and Water Use and Ecosystem Services | Baseline (Point J) | Conservation Policies                                |                                  |                                       |                             |
|-------------------------------------------|--------------------|------------------------------------------------------|----------------------------------|---------------------------------------|-----------------------------|
|                                           |                    | Cost-Share Reservoir Construction Costs <sup>a</sup> | Tax on Ground-Water <sup>b</sup> | Total Maximum Daily Load <sup>c</sup> | Carbon Credits <sup>d</sup> |
| Rice                                      | 204                | 212                                                  | 199                              | 211                                   | 162                         |
| Irrigated corn                            | 412                | 412                                                  | 412                              | 406                                   | 412                         |
| Irrigated cotton                          | 99                 | 98                                                   | 100                              | 84                                    | 101                         |
| Irrigated soybeans                        | 192                | 200                                                  | 178                              | 179                                   | 171                         |
| Non-irrigated soybeans                    | 0                  | 0                                                    | 0                                | 0                                     | 0                           |
| Non-irrigated sorghum                     | 178                | 160                                                  | 183                              | 142                                   | 200                         |
| Double crop soybean                       | 26                 | 23                                                   | 28                               | 20                                    | 31                          |
| Reservoirs                                | 17                 | 29                                                   | 26                               | 21                                    | 32                          |
| CRP                                       | 13                 | 8                                                    | 17                               | 78                                    | 34                          |
| Groundwater use (thousand acre-feet)      | 1031               | 922                                                  | 909                              | 969                                   | 744                         |
| Reservoir water use (thousand acre-feet)  | 204                | 333                                                  | 298                              | 242                                   | 366                         |
| Aquifer (thousand acre-feet)              | 61,931             | 65,867                                               | 66,300                           | 63,757                                | 71,222                      |
| Net carbon emissions (thousand tons)      | 830                | 719                                                  | 685                              | 753                                   | 487                         |
| Methane emissions (thousand tons)         | 100                | 103                                                  | 97                               | 103                                   | 79                          |
| Annual phosphorus exports (tons)          | 125                | 123                                                  | 124                              | 101                                   | 124                         |
| Annual nitrogen exports (tons)            | 361                | 355                                                  | 357                              | 315                                   | 360                         |
| Annual sediment exports (thousand tons)   | 985                | 974                                                  | 970                              | 783                                   | 945                         |

Notes: <sup>a</sup> The cost share for irrigation reservoir construction is 65% based on the rate from Natural Resource Conservation Service's (USDA-NRCS) Agricultural Water Enhancement Program [16]; <sup>b</sup> A tax on groundwater pumping cost of 15% is chosen to achieve groundwater conservation similar to the cost share on reservoir construction; <sup>c</sup> The total maximum annual load is chosen as the phosphorus and sediment exports from point CC on the efficiency frontier optimizing water purification value in the final period; <sup>d</sup> The value of a carbon credit is \$28.51 per metric ton of carbon according to the clearing price of the March 2015 auction by the European Union Emission Trading Scheme and an exchange rate of \$0.87 per euro [18].

## References

- Hogan, R.; Stiles, S.; Tacker, P.; Vories, E.; Bryant, K.J. *Estimating Irrigation Costs*; FSA28-PD-6-07RV; Arkansas Cooperative Extension Service: Little Rock, AR, USA, 2007.
- Reckhow, K.H.; Beaulac, M.N.; Simpson, J.T. *Modeling Phosphorus Loading and Lake Response under Uncertainty: A Manual and Compilation of Export Coefficients*; EPA/440/5-80/011; Environmental Protection Agency: Washington, DC, USA, 1980.
- Tallis, H.T.; Ricketts, T.; Guerry, A.D.; Nelson, E.; Ennaanay, D.; Wolny, S.; Olwero, N.; Vigerstol, K.; Pennington, D.; Mendoza, G.; et al. *InVEST 2.1 beta User's Guide*; The Natural Capital Project: Stanford, MT, USA, 2011. Available online: <http://www.naturalcapitalproject.org/InVEST.html> (accessed on 28 April 2013).
- Dwyer, L.M.; Stewart, D.W.; Balchin, D. Rooting Characteristics of corn, soybeans and barley as a function of available water and soil physical characteristics. *Can. J. Soil Sci.* **1998**, *68*, 121–132.
- Simpson, T.W.; Sharpley, A.N.; Howarth, R.W.; Paerl, H.W.; Mankin, K.R. The new gold rush: Fueling ethanol production while protecting water quality. *J. Environ. Qual.* **2008**, *37*, 318–324.
- Allen, R.G.; Pereira, L.S.; Raes, D.; Smith, M. Crop evapotranspiration. Guidelines for computing crop water requirements. *FAO Irrig. Drain. Pap.* **1998**, *56*. Available online: <http://www.fao.org/docrep/x0490e/x0490e0b.htm> (accessed on 28 June 2013).

7. Manley, S.W.; Kaminski, R.M.; Rodrigue, P.B.; Dewey, J.C.; Schoenholtz, S.H.; Gerard, P.D.; Reinecke, K.J. Soil and nutrient retention in winter-flooded ricefields with implications for watershed management. *J. Soil Water Conserv.* **2009**, *64*, 173–182.
8. Wischmeier, W.H.; Smith, D. *Predicting Rainfall Erosion Losses: A Guide to Conservation Planning*; USDA-ARS Agriculture Handbook: Washington, DC, USA, 1978.
9. Moore, P.A.; Baugh, K.K.; Norman, R.J.; Wells, B.R.; Helms, R.S. Nutrient runoff from rice fields. In *Arkansas Rice Research Studies 1992*; Wells, B.R., Ed.; University of Arkansas Agricultural Experiment Station Research Series: Little Rock, AR, USA, 1993; Volume 431, pp. 142–149.
10. Mishra, H.S.; Rathore, T.R.; Pant, R.C. Root growth, water potential, and yield of irrigated rice. *Irrig. Sci.* **1997**, *17*, 69–75.
11. Phocaides, A. *Handbook on Pressurized Irrigation Techniques*, 2nd ed.; Food and Agriculture Organization of the United Nations: Rome, Italy, 2007. Available online: <ftp://ftp.fao.org/docrep/fao/010/a1336e/a1336e06.pdf> (accessed on 24 May 2013)
12. United States Department of Agriculture. *Assessment of the Effects of Conservation Practices on Cultivated Cropland in the Upper Mississippi River Basin*; Revised CEAP Report; USDA: Beltsville, MD, USA, 2012; pp. 57–65.
13. Reddy, K.R. Nitrogen cycling in a flooded-soil ecosystem planted to rice (*Oryza sativa* L.). *Plant Soil* **1982**, *67*, 209–220.
14. Tallis, H.T.; Ricketts, T.; Guerry, A.D.; Nelson, E.; Ennaanay, D.; Wolny, S.; Olwero, N.; Vigerstol, K.; Pennington, D.; Mendoza, G.; et al. *InVEST 2.1 beta User's Guide*; The Natural Capital Project: Stanford, MT, USA, 2011. Available online: <http://www.naturalcapitalproject.org/InVEST.html> (accessed on 28 April 2013).
15. Natural Resources Conservation Service (NRCS). Soil Survey staff, Soil Survey Geographic (SSURGO) Database for Arkansas, 2013. Available online: <http://soildatamart.nrcs.usda.gov> (accessed on 28 April 2013).
16. Natural Resources Conservation Service (NRCS). *Arkansas RUSLE Cropping Management Regions*; Agronomy Technical Guide Reference No. 2; 2 January 2004.
17. Popp, M.; Nalley, L.; Fortin, C.; Smith, A.; Brye, K. Estimating net carbon emissions and agricultural response to potential carbon offset policies. *Agron. J.* **2011**, *103*, 1132–1143.
18. European Commission Emission Trading Scheme. Auctions by the Transitional Common Auction Platform. January 2015. Available online: [http://ec.europa.eu/clima/policies/ets/cap/auctioning/docs/cap\\_report\\_201503\\_en.pdf](http://ec.europa.eu/clima/policies/ets/cap/auctioning/docs/cap_report_201503_en.pdf) (accessed on 19 July 2015).
